# Supplementary material for: The C. elegans GATA transcription factor elt-2 mediates distinct transcriptional responses and opposite infection outcomes towards different Bacillus thuringiensis strains
Source: PLoS Pathog. 2020 Sep 24;16(9):e1008826. doi: 10.1371/journal.ppat.1008826 (PMC7513999; doi:10.1371/journal.ppat.1008826)
Supplement: S6 Table — (XLSX) [file ppat.1008826.s012.xlsx]

## Sheet: Worm and bacterial strains
S6 Table. List of worm and bacterial strains used in this study.
Species	Strain	Genotype	Source
Worm strains
Caenorhabditis elegans	N2	wild-type	Caenorhabditis Genetics Center
Caenorhabditis elegans	GR1307	daf-16(mgDf50)I.	Caenorhabditis Genetics Center
Caenorhabditis elegans	KU25	pmk-1(km25)IV.	Caenorhabditis Genetics Center
Caenorhabditis elegans	KU4	sek-1(km4)X.	Caenorhabditis Genetics Center
Caenorhabditis elegans	VC1184	jun-1(gk551)II.	Caenorhabditis Genetics Center
Caenorhabditis elegans	DH26	fer-15(b26)II.	Caenorhabditis Genetics Center
Caenorhabditis elegans	GC833	glp-1(ar202)III.	Caenorhabditis Genetics Center
Caenorhabditis elegans	DG2389	glp-1(bn18)III.	Caenorhabditis Genetics Center
Caenorhabditis elegans	AE501	nhr-8(ok186)IV.	Caenorhabditis Genetics Center
Caenorhabditis elegans	VC1629	nhr-99(gk758)V.	Caenorhabditis Genetics Center
Caenorhabditis elegans	JT73	itr-1(sa73)IV.	Caenorhabditis Genetics Center
Caenorhabditis elegans	RB938	vha-12(ok821)X.	Caenorhabditis Genetics Center
Caenorhabditis elegans	HY496	bre-1(ye4)IV.	Caenorhabditis Genetics Center
Caenorhabditis elegans	HY494	bre-2(ye31)III.	Caenorhabditis Genetics Center
Caenorhabditis elegans	HY483	bre-3(ye26)III.	Caenorhabditis Genetics Center
Caenorhabditis elegans	HY485	bre-4(ye27)IV.	Caenorhabditis Genetics Center
Caenorhabditis elegans	HY498	bre-5(ye17)I.	Caenorhabditis Genetics Center
Caenorhabditis elegans	AS270	gly-12(id47)X.	Caenorhabditis Genetics Center
Caenorhabditis elegans	RB871	gly-13(ok712)X.	Caenorhabditis Genetics Center
Caenorhabditis elegans	AS271	gly-14(id48)III.	Caenorhabditis Genetics Center
Caenorhabditis elegans	RB2205	hex-2(ok2985)V.	Caenorhabditis Genetics Center
Caenorhabditis elegans	VC1278	hex-2(ok1764)V.	Caenorhabditis Genetics Center
Caenorhabditis elegans	VC433	sod-3(gk235)X.	Caenorhabditis Genetics Center
Caenorhabditis elegans	HT1593	unc-119(ed3)III.	Caenorhabditis Genetics Center
Caenorhabditis elegans	VC3152	spp-8(ok3758)IV.	Matthias Leippe
Caenorhabditis elegans	BJ49	kcIs6[ifb-2::cfp]IV.	Michael Hengartner
Caenorhabditis elegans	FX04479	nhr-193(tm4479)V.	National Bio Resource Project
Caenorhabditis elegans	FX00666	asp-1(tm666)V.	National Bio Resource Project
Caenorhabditis elegans	FX02725	hex-3(tm2725)III.	National Bio Resource Project
Caenorhabditis elegans	FX01078	aman-2(tm1078)V.	National Bio Resource Project
Caenorhabditis elegans	MY1094	unc-119(ed3); yaEx80 (pnhr-193::GFP; pmyo-2::RFP; pPK605)	Schulenburg group
Caenorhabditis elegans	MY2770	unc-119(ed3);nhr-193(tm4479)	Schulenburg group
Caenorhabditis elegans	MY1115	unc-119(ed3);nhr-193(tm4479); yaEx110[pnhr-193::NHR-193; pmyo-2::RFP; pPK605]	Schulenburg group
Bacteria strains
Bacillus thuringiensis	MYBt18247 (BT247)	wild-type	Agriculture Research Service Patent Culture Collection of N/A Microorganisms and Cell Cultures-NRRL (United States Department of Agriculture, Peoria, Illinois, USA). Isolated initially from NRRL-Bt18247.
Bacillus thuringiensis	MYBt18247-C3-15 (BT247(-Cry6Ba))	pHT315[paphA3'::rfp]	Hinrich Schuleburg
Bacillus thuringiensis	Bt407	wild-type	Christina Nielsen-LeRoux (INRA-France).
Bacillus thuringiensis	MYBt18679 (BT679)	wild-type	Agriculture Research Service Patent Culture Collection of N/A Microorganisms and Cell Cultures-NRRL (United States Department of Agriculture, Peoria, Illinois, USA). Isolated initially from NRRL-Bt18679.
Bacillus thuringiensis	MYBt18679 (BT679(-Cry))	pHT315[paphA3'::rfp]	Hinrich Schuleburg
Bacillus thuringiensis	MYBt18679 (BT679(-Cry))	pHT315[paphA3'::cry14A]	Hinrich Schuleburg
Bacillus thuringiensis	MYBt18679 (BT679(-Cry))	pHT315[paphA3'::cry21A]	Hinrich Schuleburg
Escherichia coli	OP50	wild-type (uracil auxotroph)	Caenorhabditis Genetics Center
Escherichia coli	HT115(DE3)	L4440[elt-2]	Ahringer library (Source Bioscience) position X-5I11
Escherichia coli	HT115(DE3)	L4440[bli-3]	Ahringer library (Source Bioscience) position I-1A05
Escherichia coli	HT115(DE3)	L4440[unc-22]	Ahringer library (Source Bioscience) position IV-6K06
Escherichia coli	HT115(DE3)	L4440[plc-3]	Ahringer library (Source Bioscience) position II-7O15
